# 1 Network hubs in root-associated fungal 2 metacommunities

3

4 Hirokazu Toju<sup>1,2\*</sup>, Akifumi S. Tanabe<sup>3</sup>, Hirotoishi Sato<sup>4</sup>

5

6 \*Correspondence: [toju.hirokazu.4c@kyoto-u.ac.jp](mailto:toju.hirokazu.4c@kyoto-u.ac.jp)

7 <sup>1</sup>Center for Ecological Research, Kyoto University, Otsu, Shiga 520-2113, Japan

8 <sup>2</sup>Precursory Research for Embryonic Science and Technology (PRESTO), Japan Science and  
9 Technology Agency, Kawaguchi, Saitama 332-0012, Japan

10 <sup>3</sup>Faculty of Science and Technology, Ryukoku University, 1-5 Yokotani, Seta Oe-cho, Otsu,  
11 Shiga 520-2194, Japan

12 <sup>4</sup>Graduate School of Human and Environmental Studies, Kyoto University, Sakyo, Kyoto  
13 606-8501, Japan

14

15 This article includes 5 Figures, 1 Table, and 9 additional files.

16

## 17 **Abstract**

18 **Background:** Although a number of recent studies have uncovered remarkable diversity of  
19 microbes associated with plants, understanding and managing dynamics of plant microbiomes  
20 remain major scientific challenges. In this respect, network analytical methods have provided  
21 a basis for exploring “hub” microbial species, which potentially organize community-scale  
22 processes of plant–microbe interactions.

23 **Methods:** By compiling Illumina sequencing data of root-associated fungi in eight forest  
24 ecosystems across the Japanese Archipelago, we explored hubs within “metacommunity-scale”  
25 networks of plant–fungus associations. In total, the metadata included 8,080 fungal  
26 operational taxonomic units (OTUs) detected from 227 local populations of 150 plant  
27 species/taxa.

28 **Results:** Few fungal OTUs were common across all the eight forests. However, in each  
29 metacommunity-scale network representing northern four localities or southern four localities,  
30 diverse mycorrhizal, endophytic, and pathogenic fungi were classified as “metacommunity  
31 hubs”, which could associate with diverse host plant taxa throughout a climatic region.  
32 Specifically, *Mortierella* (Mortierellales), *Cladophialophora* (Chaetothyriales), *Ilyonectria*  
33 (Hypocreales), *Pezicula* (Helotiales), and *Cadophora* (incertae sedis) had broad geographic  
34 and host ranges across the northern (cool-temperate) region, while *Saitozyma/Cryptococcus*  
35 (Tremellales/Trichosporonales) and *Mortierella* as well as some arbuscular mycorrhizal fungi  
36 were placed at the central positions of the metacommunity-scale network representing  
37 warm-temperate and subtropical forests in southern Japan.

38 **Conclusions:** The network theoretical framework presented in this study will help us explore  
39 prospective fungi and bacteria, which have high potentials for agricultural application to  
40 diverse plant species within each climatic region. As some of those fungal taxa with broad  
41 geographic and host ranges have been known to increase the growth and pathogen resistance  
42 of host plants, further studies elucidating their functional roles are awaited.

43 **Keywords:** biodiversity; community ecology; host specificity or preference; latitudinal  
44 gradients; metacommunities; microbial inoculation; microbiomes; network hubs; plant–

45 fungus interactions; mycorrhizal and endophytic symbiosis.

46

## 47 **Background**

48 Below-ground fungi associated with plants in the endosphere and rhizosphere are key drivers  
49 of terrestrial ecosystem processes [1-4]. Mycorrhizal fungi, for example, are important  
50 symbionts of most land plant species, enhancing nutritional conditions and pathogen  
51 resistance of host plants [5-7]. In reward for the essential physiological services, they receive  
52 ca. 20% of net photosynthetic products from plants [8, 9]. Recent studies have also indicated  
53 that diverse taxonomic groups of endophytic fungi (e.g., endophytic fungi in the ascomycete  
54 orders Helotiales and Chaetothyriales) commonly interact with plant roots, providing soil  
55 nitrogen/phosphorous to their hosts [10-14], converting organic nitrogen into inorganic forms  
56 in the rhizosphere [15], and increasing plants' resistance to environmental stresses [16-18].  
57 Because of their fundamental roles, below-ground fungi have been considered as prospective  
58 sources of ecosystem-level functioning in forest management, agriculture, and ecosystem  
59 restoration [17-20]. However, due to the exceptional diversity of below-ground fungi [21-23]  
60 and the extraordinary complexity of below-ground plant–fungus interactions [24-26], we are  
61 still at an early stage of managing and manipulating plant-associated microbiomes [27-29].

62 In disentangling complex webs of below-ground plant–fungus associations, network  
63 analyses, which have been originally applied to human relations and the World-Wide Web  
64 [30, 31], provide crucial insights. By using network analytical tools, we can infer how plant  
65 species in a forest, grassland, or farmland are associated with diverse taxonomic and  
66 functional groups of fungi [24, 32-34]. Such information of network structure (topology) can  
67 be used to identify “hub” species, which are placed at the center of a network depicting  
68 multispecies host–symbiont associations [35] (cf. [34, 36, 37]). Those hubs with broad  
69 host/symbiont ranges are expected to play key roles by mediating otherwise discrete  
70 ecological processes within a community [19, 24]. For example, although arbuscular  
71 mycorrhizal and ectomycorrhizal symbioses have been considered to involve distinct sets of  
72 plant and fungal lineages [38] (but see [39, 40]), hub endophytic fungi with broad host ranges  
73 may mediate indirect interactions between arbuscular mycorrhizal and ectomycorrhizal plant  
74 species through below-ground mycelial connections. As information of plant-associated  
75 fungal communities is now easily available with high-throughput DNA sequencing

76 technologies [1, 21, 22], finding hub microbial species out of hundreds or thousands of  
77 species within a network has become an important basis for understanding and predicting  
78 ecosystem-scale phenomena.

79       Nonetheless, given that fungi can disperse long distances with spores, conidia, and  
80 propagules [41-44], information of local-scale networks alone does not provide thorough  
81 insights into below-ground plant–fungus interactions in the wild. In other words, no forests,  
82 grasslands, and farmlands are free from perturbations caused by fungi immigrating from other  
83 localities [45-49]. Therefore, to consider how local ecosystem processes are interlinked by  
84 dispersal of fungi, we need to take into account “metacommunity-scale” networks of plant–  
85 fungus associations [35]. Within a dataset of multiple local communities (e.g., [25]), fungal  
86 species that occur in multiple localities may interlink local networks of plant–fungus  
87 associations. Among them, some species that not only have broad geographic ranges but also  
88 are associated with diverse host plant species would be placed at the core positions of a  
89 metacommunity-scale network [35]. Such “metacommunity hub” fungi would be major  
90 drivers of the synchronization and restructuring of local ecosystem processes (*sensu* [50]),  
91 and hence their functional roles need to be investigated with priority [35]. Moreover, in the  
92 screening of mycorrhizal and endophytic fungi that can be used in agriculture and ecosystem  
93 restoration programs [17, 20, 51], analytical pipelines for identifying metacommunity hubs  
94 will help us explore species that are potentially applied (inoculated) to diverse plant species  
95 over broad geographic ranges of farmlands, forests, or grasslands. Nonetheless, despite the  
96 potential importance of metacommunity hubs in both basic and applied microbiology, few  
97 studies have examined metacommunity-level networks of plant–symbiont associations.

98       By compiling Illumina sequencing datasets of root-associated fungi [52], we herein  
99 inferred a metacommunity-level network of below-ground plant–fungus associations and  
100 thereby explored metacommunity hubs. Our metadata consisted of plant–fungus association  
101 data in eight forest localities across the entire range of the Japanese Archipelago, including  
102 150 plant species/taxa and 8,080 fungal operational taxonomic units (OTUs) in temperate and  
103 subtropical regions. Based on the information of local- and metacommunity-level networks,  
104 each of the fungal OTUs was evaluated in light of its topological positions. We then

105 examined whether fungal OTUs placed at the core of local-level plant–fungus networks could  
106 play key topological roles within the metacommunity-level network. Overall, this study  
107 uncover how diverse taxonomic groups of mycorrhizal and endophytic fungi can form  
108 metacommunity-scale networks of below-ground plant–fungus associations, providing a basis  
109 for analyzing complex spatial processes of species-rich host–microbe systems.

110

## 111 **Methods**

### 112 **Terminology**

113 While a single type of plant–fungus interactions is targeted in each of most mycological  
114 studies (e.g., arbuscular mycorrhizal symbiosis or ectomycorrhizal symbiosis), we herein  
115 analyze the metadata including multiple categories of below-ground plant–fungus  
116 associations [52]. Because arbuscular mycorrhizal, ectomycorrhizal, and endophytic fungi, for  
117 example, vary in their microscopic structure within plant tissue [38], it is impossible to  
118 develop a general criterion of mutualistic/antagonistic interactions for all those fungal  
119 functional groups. Therefore, we used the phrase “associations” instead of “interactions”  
120 throughout the manuscript when we discuss patterns detected based on the Illumina  
121 sequencing metadata of root-associated fungi. Consequently, our results represented not only  
122 mutualistic or antagonistic interactions but also neutral or commensalistic interactions [24, 53,  
123 54]. Our aim in this study is to gain an overview of the metacommunity-scale plant–fungus  
124 associations, while the nature of respective plant–fungus associations should be evaluated in  
125 future inoculation experiments.

126

### 127 **Data**

128 We compiled the Illumina (MiSeq) sequencing data collected in a previous study [52], in  
129 which community-scale statistical properties of below-ground plant–fungus associations were  
130 compared among eight forest localities (four cool-temperate, one warm-temperate, and three  
131 subtropical forests) across the entire range of the Japanese Archipelago (45.042–24.407 °N;

132 Fig. 1) (DDBJ Sequence Read Archives accession: DRA006339). In each forest, 2-cm  
133 segment of terminal roots were sampled from 3-cm below the soil surface at 1-m horizontal  
134 intervals [52]. Those root samples were collected irrespective of their morphology and  
135 mycorrhizal type: hence, the samples as a whole represented below-ground relative  
136 abundance of plant species in each forest community. Based on the sequences of the genes  
137 encoding the large subunit of ribulose-1,5-bisphosphate carboxylase (*rbcL*) and the internal  
138 transcribed spacer 1 (ITS1) of the ribosomal RNA region, host plant species were identified,  
139 although there were plant root samples that could not be identified to species with the *rbcL*  
140 and ITS1 regions [52].

141 The Illumina sequencing reads of the fungal ITS1 region were processed as detailed in  
142 the data-source study [52]. The primers used were designed to target not only Ascomycota  
143 and Basidiomycota but also diverse non-Dikarya (e.g., Glomeromycota) taxa [55]. In most  
144 studies analyzing community structure of Ascomycota and Basidiomycota fungi, OTUs of the  
145 ITS region are defined with a cut-off sequence similarity of 97% [22, 56, 57] (see also [58]).  
146 Meanwhile, Glomeromycota fungi generally have much higher intraspecific ITS-sequence  
147 variation than other taxonomic groups of fungi [59]. Consequently, we used 97% and 94%  
148 cut-off sequence similarities for defining non-Glomeromycota and Glomeromycota fungal  
149 OTUs, respectively [52]. The OTUs were then subjected to reference database search with the  
150 query-centric auto-*k*-nearest-neighbor algorithm [60, 61] and subsequent taxonomic  
151 assignment with the lowest common ancestor algorithm [62]. Based on the inferred taxonomy,  
152 the functional group of each fungal OTU was inferred using the program FUNGuild 1.0 [63].

153 After a series of bioinformatics and rarefaction procedures, 1,000 fungal ITS reads were  
154 obtained from each of the 240 samples collected in each forest locality (i.e., 1,000 reads × 240  
155 samples × 8 sites). A sample (row) × fungal OTU (column) data matrix, in which a cell entry  
156 depicted the number of sequencing reads of an OTU in a sample, was obtained for each local  
157 forest (“sample-level” matrix) (Additional file 1: Data S1). Each local sample-level matrix  
158 was then converted into a “species-level” matrix, in which a cell entry represented the number  
159 of root samples from which associations of a plant species/taxa (row) and a fungal OTU  
160 (columns) was observed: 17–55 plant species/taxa and 1,149–1,797 fungal OTUs were

161 detected from the local species-level matrices (Additional file 2: Data S2). In total, the  
162 matrices included 150 plant species/taxa and 8,080 fungal OTUs (Additional file 3: Data S3).

163

## 164 **Local networks**

165 Among the eight forest localities, variation in the order-level taxonomic compositions were  
166 examined with the permutational analysis of variance (PERMANOVA; [64]) and the  
167 permutational analysis for the multivariate homogeneity of dispersions (PERMDISP; [65])  
168 with the “adonis” and “betadisper” functions of the vegan 2.4-3 package [66] of R 3.4.1 [67],  
169 respectively. The  $\beta$ -diversity values used in the PERMANOVA and PERMDISP analyses  
170 were calculated with the “Bray-Curtis” metric based on the sample-level matrices (Additional  
171 file 1: Data S1). Note that the “Raup-Crick”  $\beta$ -diversity metric [68], which controls  
172  $\alpha$ -diversity in community data but requires computationally intensive randomization, was not  
173 applicable to our large metadata. Geographic variation in the compositions of fungal  
174 functional groups was also evaluated by PERMANOVA and PERMDISP analyses.

175 For each of the eight local forests, the network structure of below-ground plant–fungus  
176 associations was visualized based on the species-level matrix (Additional file 2: Data S2)  
177 using the program Gephi 0.9.1 [69] with the “ForceAtlas2” layout algorithm [70]. Within the  
178 networks, the order-level taxonomy of fungal OTUs was highlighted.

179 To evaluate host ranges of each fungal OTU in each local forest, we first calculated the  $d'$   
180 metric of interaction specificity [71]. However, estimates of the  $d'$  metric varied considerably  
181 among fungal OTUs observed from small numbers of root samples (Additional file 4; Figure  
182 S1) presumably due to overestimation or underestimation of host preferences for those rare  
183 OTUs. Therefore, we scored each fungal OTU based on their topological positions within  
184 each local network by calculating network centrality indices (degree, closeness, betweenness,  
185 and eigenvector centralities metrics of network centrality; [31]). Among the centrality metrics,  
186 betweenness centrality, which measures the extent to which a given nodes (species) is located  
187 within the shortest paths connecting pairs of other nodes in a network [72], is often used to  
188 explore organisms with broad host or partner ranges [35]. Thus, in each local network, fungal



189 OTUs were ranked based on their betweenness centrality scores (local betweenness).

190

### 191 **Metacommunity-scale network**

192 By compiling the species-level matrices of the eight local forests, the topology of the  
193 metacommunity-scale network of plant–fungus associations was inferred. In general, species  
194 interaction (association) networks of local communities can be interconnected by species that  
195 appear in two or more local networks, thereby merged into a metacommunity-scale network  
196 [35]. In our data across the eight local forests, 2,109 OTUs out of the 8,080 fungal OTUs  
197 appeared in two or more localities. Therefore, we could infer the topology of a  
198 metacommunity-scale network, in which the eight local networks were combined by the  
199 2,109 fungal OTUs. In the metacommunity-scale network, plant species/taxa observed in  
200 different localities were treated as different network nodes because our purpose in this study  
201 was to explore fungi that potentially play key roles in synchronizing local ecosystem  
202 processes [35]. In total, 227 plant nodes representing local populations of 150 plant  
203 species/taxa were included in the metacommunity-scale network.

204 We then screened for fungal OTUs with broad geographic and host ranges based on the  
205 betweenness centrality scores of respective fungal OTUs within the metacommunity network  
206 (metacommunity betweenness,  $B_{\text{meta}}$ ). In general, species with highest metacommunity  
207 betweenness scores not only occur in local communities over broad biotic/abiotic  
208 environmental conditions but also are associated with broad ranges of host/partner species  
209 [35]. Possible relationship between local- and metacommunity-scale topological roles was  
210 then examined by plotting local and metacommunity betweenness scores ( $B_{\text{local}}$  and  $B_{\text{meta}}$ ) of  
211 each fungal OTUs on a two-dimensional surface. To make the betweenness scores vary from  
212 0 to 1, betweenness centrality of a fungal OTU  $i$  was standardized in each of the local- and  
213 metacommunity-scale networks as follows:

$$214 \quad B'_{\text{local}, i} = \frac{B_{\text{local}, i} - \min(B_{\text{local}})}{\max(B_{\text{local}}) - \min(B_{\text{local}})} \quad \text{and} \quad B'_{\text{meta}, i} = \frac{B_{\text{meta}, i} - \min(B_{\text{meta}})}{\max(B_{\text{meta}}) - \min(B_{\text{meta}})},$$

215 where  $B_{\text{local},i}$  and  $B_{\text{meta},i}$  were raw estimates of local- and metacommunity-scale  
216 betweenness of a fungal OTU  $i$ , and  $\min()$  and  $\max()$  indicated minimum and maximum  
217 values, respectively. For local betweenness of each OTU, a mean value across local networks  
218 was subsequently calculated ( $\bar{B}'_{\text{local},i}$ ): the local communities from which a target OTU was  
219 absent was omitted in the calculation of mean local betweenness. On the two-dimensional  
220 surface, the OTUs were then classified into four categories: metacommunity hubs having high  
221 betweenness in both local- and metacommunity-scale networks ( $\bar{B}'_{\text{local},i} \geq 0.5$ ;  $B'_{\text{meta},i} \geq$   
222  $0.5$ ), metacommunity connectors that had broad geographic ranges but displayed low local  
223 betweenness ( $\bar{B}'_{\text{local},i} < 0.5$ ;  $B'_{\text{meta},i} \geq 0.5$ ), local hubs that had high betweenness in local  
224 networks but not in the metacommunity-scale network ( $\bar{B}'_{\text{local},i} \geq 0.5$ ;  $B'_{\text{meta},i} < 0.5$ ), and  
225 peripherals with low betweenness at both local and metacommunity levels ( $\bar{B}'_{\text{local},i} < 0.5$ ;  
226  $B'_{\text{meta},i} < 0.5$ ) [35]. Approximately, 1–2% of fungal OTUs show betweenness scores higher  
227 than 0.5 in each local or metacommunity network, while the threshold value can be changed  
228 depending on the purpose of each study [35].

229 In addition to metacommunity hubs within the metacommunity-scale network  
230 representing all the eight localities, those within the metacommunity-scale network  
231 representing northern (sites 1–4) or southern (sites 5–8) four localities were also explored.  
232 This additional analysis allowed us to screen for fungal OTUs that potentially adapted to  
233 broad ranges of biotic and abiotic environments within northern (cool-temperate) or southern  
234 (warm-temperate or subtropical) part of Japan.

235

## 236 **Results**

### 237 **Local networks**

238 Among the eight forest localities, order-level taxonomic compositions of fungi varied  
239 significantly (PERMANOVA;  $F_{\text{model}} = 35.7$ ,  $P < 0.001$ ), while the differentiation of  
240 community structure was attributed at least partly to geographic variation in among-sample  
241 dispersion (PERMDISP;  $F = 13.2$ ,  $P < 0.001$ ) (Fig. 2a). Compositions of fungal functional  
242 groups were also differentiated among the eight localities (PERMANOVA;  $F_{\text{model}} = 34.9$ ,  $P <$

243 0.001), while within-site dispersion was significantly varied geographically (PERMDISP;  $F =$   
244 9.2,  $P < 0.001$ ) (Fig. 2b). The proportion of ectomycorrhizal fungal orders, such as Russulales,  
245 Thelephorales, and Sebaciniales, was higher in temperate forests than in subtropical forests,  
246 while that of arbuscular mycorrhizal fungi increased in subtropical localities (Fig. 2). The  
247 proportion of the ascomycete order Helotiales, which has been known to include not only  
248 ectomycorrhizal but also endophytic, saprotrophic, and ericoid mycorrhizal fungi [73], was  
249 higher in northern localities. In contrast, Diaporthales, which has been considered as  
250 predominantly plant pathogenic taxon [74] (but see [75]), was common in subtropical forests  
251 but not in others.

252 In each of the eight local networks depicting plant–fungus associations, some fungal  
253 OTUs were located at the central positions of the network, while others are distributed at  
254 peripheral positions (Additional file 5; Figure S2). Specifically, fungal OTUs belonging to the  
255 ascomycete orders Chaetothyriales (e.g., *Cladophialophora* and *Exophiala*) and Helotiales  
256 (e.g., *Rhizoderma*, *Pezicula*, *Rhizoscyphus*, and *Leptodontidium*) as well as some *Mortierella*  
257 OTUs had high betweenness centrality scores in each of the cool-temperate forests (Fig. 3a-b).  
258 In contrast, arbuscular mycorrhizal fungi (Glomeromycota) were common among OTUs with  
259 highest betweenness scores in subtropical forests (Fig. 3a-c). Some fungi in the ascomycete  
260 order Hypocreales (e.g., *Trichoderma*, *Ilyonectria*, *Simplicillium*, and *Calonectria*) also had  
261 high betweenness scores in some temperate and subtropical forests (Fig. 3b).

262

### 263 **Metacommunity-scale network**

264 In the metacommunity-scale network representing the connections among the eight local  
265 networks, not only arbuscular mycorrhizal but also saprotrophic/endophytic fungi were placed  
266 at the central topological positions (Fig. 4; Additional file 6; Figure S3). Among  
267 non-Glomeromycota OTUs, *Mortierella* (Mortierellales), *Cryptococcus* (Trichosporonales;  
268 the Blast top-hit fungus in the NCBI database was recently moved to *Saitozyma*  
269 (Tremellales); [76]), *Malassezia* (Malasseziales), *Oidiodendron* (incertae sedis), *Trichoderma*  
270 (Hypocreales), and a fungus distantly allied to *Melanconiella* (Diaporthales) displayed highest

271 metacommunity betweenness (Table 1). Among the OTUs with high metacommunity  
272 betweenness, only a *Mortierella* OTU was designated as a metacommunity hub (i.e.,  $\bar{B}'_{\text{local},i}$   
273  $\geq 0.5$ ;  $B'_{\text{meta},i} \geq 0.5$ ) and others had low betweenness scores at the local community level  
274 ( $\bar{B}'_{\text{local},i} < 0.5$ ; Fig. 5a).

275 In the metacommunity-scale network representing the four cool-temperate forests (sites  
276 1–4), many saprotrophic/endophytic fungal OTUs were associated with diverse plant  
277 species/taxa, located at the central topological positions within the network topology  
278 (Additional file 7; Figure S4; Fig. 5b). The list of these fungi with high metacommunity  
279 betweenness involved OTUs in the genera *Mortierella*, *Cladophialophora* (Chaetothyriales),  
280 *Pezicula* (Helotiales), and *Oidiodendron* as well as OTUs allied to *Ilyonectria protearum*  
281 (Nectriales) and *Cadophora orchidicola* (Helotiales) (Table 1). Most of those fungal OTUs  
282 also had high metacommunity betweenness, designated as metacommunity hubs (Fig. 5b).

283 In the metacommunity-scale network consisting of the warm-temperate and subtropical  
284 forests (sites 5–8), arbuscular mycorrhizal and saprotrophic/endophytic fungi were placed at  
285 the hub positions (Additional file 8; Figure S5; Fig. 5c). The list of non-Glomeromycota  
286 OTUs with highest metacommunity betweenness included *Saitozyma* (*Cryptococcus*),  
287 *Mortierella*, *Trichoderma*, and *Tomentella* as well as OTUs allied to *Cladophialophora*,  
288 *Scleropezicula* (Helotiales), *Melanconiella* (Diaporthales), and *Rhexodenticula* (incertae  
289 sedis) (Table 1). Among the taxa, *Saitozyma* and *Mortierella* included OTUs classified as  
290 metacommunity hubs (Fig. 5c; Table 1). In an additional analysis of a metacommunity-scale  
291 network including only the three subtropical forests (sites 6–8), similar sets of fungal taxa  
292 were highlighted (Additional file 9; Table S1). The detailed information of the network index  
293 scores examined in this study is provided in Data S3 (Additional file 3: Data S3).

294

## 295 Discussion

296 Based on the metadata of root-associated fungi across the Japanese Archipelago, we herein  
297 inferred the structure of a network representing metacommunity-scale associations of 150  
298 plant species/taxa and 8,080 fungal OTUs. Our analysis targeted diverse functional groups of

299 fungi such as arbuscular mycorrhizal, ectomycorrhizal, ericoid-mycorrhizal,  
300 saprotrophic/endophytic, and pathogenic fungi, which have been analyzed separately in most  
301 previous studies on plant–fungus networks. The comprehensive analysis of below-ground  
302 plant–fungus associations allowed us to explore metacommunity hub fungi, which not only  
303 occurred over broad geographic ranges but also had broad host ranges in respective local  
304 communities. Consequently, this study highlights several taxonomic groups of fungi  
305 potentially playing key roles in synchronizing metacommunity-scale processes of temperate  
306 and/or subtropical forests.

307 In the metacommunity-scale network representing all the eight local forests (Fig. 4),  
308 fungi in several saprotrophic or endophytic taxa showed higher betweenness centrality scores  
309 than other fungi (Table 1). *Mortierella* is generally considered as a saprotrophic lineage [77]  
310 but it also includes fungi contributing to the growth and pathogen resistance of plants [78-80].  
311 A phosphate solubilizing strain of *Mortierella*, for example, increases shoot and root growth  
312 of host plants under salt stress, especially when co-inoculated with an arbuscular mycorrhizal  
313 fungus [78]. In addition, polyunsaturated fatty acids produced by some *Mortierella* species  
314 are known to increase resistance of plants against phytopathogens [79, 80]. Fungi in the genus  
315 *Trichoderma* are commonly detected and isolated from the rhizosphere [77, 81]. Many of  
316 them inhibit the growth of other fungi, often used in the biological control of phytopathogens  
317 [82-84]. Some of them are also reported to suppress root-knot nematodes [85] or to promote  
318 root growth [86]. The analysis also highlighted basidiomycete yeasts in the genus *Saitozyma*  
319 or *Cryptococcus* (teleomorph = *Filobasidiella*), which are often isolated from soil [22, 87] as  
320 well as both above-ground and below-ground parts of plants [88-91].

321 Along with those possibly saprotrophic or endophytic taxa, ericoid mycorrhizal and  
322 phytopathogenic taxa of fungi displayed relatively high betweenness scores within the  
323 metacommunity-scale network representing all the eight local forests (Table 1). Specifically,  
324 *Oidiodendron* (teleomorph = *Myxotrichum*) is a taxon represented by possibly ericoid  
325 mycorrhizal species (*O. maius* and *O. griseum*) [92, 93], although fungi in the genus are found  
326 also from roots of non-ericaceous plants and soil [94]. On the other hand, fungi in the family  
327 Nectriaceae are known to cause black foot disease [95], often having serious damage on

328 economically important woody plants [96, 97]. Although we collected seemingly benign roots  
329 in the study forests, some samples may be damaged by those pathogens. Alternatively, some  
330 lineages of Nectriaceae fungi may be associated with plant hosts non-symptomatically,  
331 having adverse effects context-dependently.

332 Although these fungi were candidates of metacommunity hubs, which are characterized  
333 by broad geographic ranges and host plant ranges, none except but a *Mortierella* OTU had  
334 high betweenness scores at both local and metacommunity levels (Fig. 5a). This result  
335 suggests that even if some fungi have broad geographic ranges across the Japanese  
336 Archipelago, few played important topological roles in each of the local networks  
337 representing plant–fungus associations. In other words, fungi that can adapt to biotic and  
338 abiotic environments in forest ecosystems throughout cool-temperate, warm-temperate, and  
339 subtropical regions are rare.

340 Therefore, we also explored fungi with broad geographic and host ranges within the  
341 metacommunities representing northern (cool-temperate) and southern (warm-temperate and  
342 subtropical) regions of Japan. In the metacommunity consisting of the four cool-temperate  
343 forests (Additional file 7; Figure S4), fungal OTUs in the genera *Mortierella*,  
344 *Cladophialophora*, and *Pezicula* as well as those allied to *Ilyonectria* and *Cadophora* had  
345 highest betweenness at both local and metacommunity levels, classified as metacommunity  
346 hubs (Fig. 5b; Table 1). Among them, *Cladophialophora* is of particular interest because it  
347 has been known as a lineage of “dark septate endophytes” [98-100] (*sensu* [14, 15, 101]). A  
348 species within the genus, *C. chaetospira* (= *Heteroconium chaetospira*), to which  
349 high-betweenness OTUs in our data were closely allied, has been known not only to provide  
350 nitrogen to host plants but also to suppress pathogens [12, 16, 102]. Likewise, the Helotiales  
351 genus *Pezicula* (anamorph = *Cryptosporiopsis*) includes endophytic fungi [103-105], some of  
352 which produce secondary metabolites suppressing other microbes in the rhizosphere [106,  
353 107]. Our finding that some of *Cladophialophora* and *Pezicula* fungi could be associated with  
354 various taxonomic groups of plants over broad geographic ranges highlights potentially  
355 important physiological and ecological roles of those endophytes at the community and  
356 metacommunity levels.

357 In the southern metacommunity networks consisting of warm-temperate and subtropical  
358 forests (Additional file 8; Figure S5), some arbuscular mycorrhizal OTUs and *Saitozyma*  
359 (*Cryptococcus*) and *Mortierella* OTUs had high betweenness scores at both local and  
360 metacommunity levels, designated as metacommunity hubs (Fig. 5c; Table 1). Given the  
361 above-mentioned prevalence of fungal OTUs allied to *Cladophialophora chaetospora* in the  
362 cool-temperate metacommunity, the contrasting list of metacommunity hubs in the southern  
363 (warm-temperate–subtropical) metacommunity implies that different taxonomic and  
364 functional groups of fungi play major metacommunity-scale roles in different climatic regions.  
365 This working hypothesis is partially supported by previous studies indicating endemism and  
366 vicariance in the biogeography of fungi and bacteria [108, 109], promoting conceptual  
367 advances beyond the classic belief that every microbe is everywhere but the environment  
368 selects microbes colonizing respective local communities [110].

369 The roles of those metacommunity hubs detected in this study are of particular interest  
370 from the aspect of theoretical ecology. Hub species connected to many other species in an  
371 ecosystem often integrate “energy channels” [111] within species interaction networks,  
372 having great impacts on biodiversity and productivity of the ecosystems [35]. The concept of  
373 “keystone” or “foundation” species [112, 113] can be extended to the metacommunity level,  
374 thereby promoting studies exploring species that restructure and synchronize ecological (and  
375 evolutionary) dynamics over broad geographic ranges [35]. Given that below-ground plant–  
376 fungus symbioses are key components of the terrestrial biosphere [1, 2], identifying fungal  
377 species that potentially have great impacts on the metacommunity-scale processes of such  
378 below-ground interactions will provide crucial insights into the conservation and restoration  
379 of forests and grasslands. We here showed that the list of metacommunity hubs could involve  
380 various lineages of endophytic fungi, whose ecosystem-scale functions have been  
381 underappreciated compared to those of mycorrhizal fungi. As those endophytic fungi are  
382 potentially used as inoculants when we reintroduce plant seedlings in ecosystem restoration  
383 programs [20, 51], exploring fungi with highest potentials in each climatic/biogeographic  
384 region will be a promising direction of research in conservation biology.

385 The finding that compositions of metacommunity hubs could vary depending on climatic

386 regions also gives key implications for the application of endophytes in agriculture. Although  
387 a number of studies have tried to use endophytic fungi and/or bacteria as microbial inoculants  
388 in agriculture [17, 18, 114], such microbes introduced to agroecosystems are often  
389 outcompeted and replaced by indigenous (resident) microbes [115, 116]. Moreover, even if an  
390 endophytic species or strain increases plant growth in pot experiments under controlled  
391 environmental conditions, its effects in the field often vary considerably depending on biotic  
392 and abiotic contexts of local agroecosystems [17] (see also [117]). Therefore, in the screening  
393 of endophytes that can be used in broad ranges of biotic and abiotic environmental conditions,  
394 the metacommunity-scale network analysis outlined in this study will help us find promising  
395 candidates out of thousands or tens of thousands microbial species in the wild. Consequently,  
396 to find promising microbes whose inocula can persist in agroecosystems for long time periods,  
397 exploration of metacommunity hubs needs to be performed in respective climatic or  
398 biogeographic regions.

399 For more advanced applications in conservation biology and agriculture, continual  
400 improvements of methods for analyzing metacommunity-scale networks are necessary. First,  
401 while the fungal OTUs in our network analysis was defined based on the cut-off sequence  
402 similarities used in other studies targeting “species-level” diversity of fungi [57, 59],  
403 physiological functions can vary greatly within fungal species or species groups [14, 118].  
404 Given that bioinformatic tools that potentially help us detect single-nucleotide-level variation  
405 are becoming available [119], the resolution of network analyses may be greatly improved in  
406 the near future. Second, although some computer programs allow us to infer functions of  
407 respective microbial OTUs within network data [63, 120], the database information of  
408 microbial functions remains scarce. To increase the coverage and accuracy of automatic  
409 annotations of microbial functions, studies describing the physiology, ecology, and genomes  
410 of microbes should be accelerated. With improved reference databases, more insights into the  
411 metacommunity-scale organization of plant–fungus associations will be obtained by  
412 reanalyzing the network data based on enhanced information of fungal functional groups.  
413 Third, as the diversity and compositions of plant–fungus associations included in a network  
414 can depend on how we process raw samples, special care is required in the selection of



415 methods for washing and preparing root (or soil) samples. By sterilizing root samples with  
416 NaClO [121], for example, we may be able to exclude fungi or bacteria that are merely  
417 adhering to root surfaces. Meanwhile, some of those fungi and bacteria on root surfaces may  
418 play pivotal physiological roles in the growth and survival of plants [122]. Accordingly, it  
419 would be productive to compare network topologies of plant–microbe associations among  
420 different source materials by partitioning endosphere, rhizoplane, and rhizosphere microbial  
421 samples with a series of sample cleaning processes using ultrasonic devices [123]. Fourth,  
422 although this study targeted fungi associated with roots, our methods can be easily extended  
423 to network analyses involving other groups of microbes. By simultaneously analyzing the  
424 prokaryote 16S rRNA region [123-125] with the fungal ITS region, we can examine how  
425 bacteria, archaea, and fungi are involved in below-ground webs of symbioses. Fifth, not only  
426 plant–microbe associations but also microbe–microbe interactions can be estimated with  
427 network analytical frameworks. Various statistical pipelines have been proposed to infer how  
428 microbes interact with each other in facilitative or competitive ways within host  
429 macroorganisms [37, 126, 127]. Overall, those directions of analytical extensions will  
430 enhance our understanding of plant microbiome dynamics in nature.

431

## 432 **Conclusions**

433 By compiling datasets of below-ground plant–fungus associations in temperate and  
434 subtropical forest ecosystems, we explored metacommunity-hub fungi, which were  
435 characterized by broad geographic and host ranges. Such metacommunity-scale analyses are  
436 expected to provide bird’s-eye views of complex plant–microbe associations, highlighting  
437 plant-growth-promoting microbes that can be applied to diverse plant taxa in various  
438 environments. Given that endophytic fungi promoting the growth and pathogen resistance of  
439 host plants can be isolated from forest soil (e.g., *Cladophialophora chaetospora* [99]), the list  
440 of metacommunity-hub endophytic fungi featured in this study itself may include prospective  
441 species to be used in agriculture. By extending the targets of such network analyses to diverse  
442 types of plant-associated microbes (e.g., phyllosphere fungi and bacteria [75, 124, 128]) in

443 various climatic/biogeographic regions, a solid basis for managing plant microbiomes will be  
444 developed.

445

#### 446 **Abbreviations**

447 DDBJ: DNA Data Bank of Japan; ITS: internal transcribed spacer; OTU: Operational  
448 taxonomic unit; PERMANOVA: permutational analysis of variance; PERMDISP:  
449 permutational analysis for the multivariate homogeneity of dispersions; rRNA: ribosomal  
450 ribonucleic acid.

451

#### 452 **Acknowledgements**

453 We thank Teshio Experimental Forest (Hokkaido University), Tomakomai Experimental  
454 Forest (Hokkaido University), Sugadaira Research Station (Tsukuba University), Yona Field  
455 (Ryukyu University), Tropical Biosphere Research Center (Ryukyu University), and Forestry  
456 Agency of Japan for the permission of fieldwork.

457

#### 458 **Funding**

459 This work was financially supported by JSPS KAKENHI Grant (26711026), JST PRESTO  
460 (JPMJPR16Q6), and the Funding Program for Next Generation World-Leading Researchers  
461 of Cabinet Office, the Government of Japan (GS014) to HT.

462

#### 463 **Availability of data and materials**

464 The Illumina sequencing data were deposited to DNA Data Bank of Japan (DDBJ Sequence  
465 Read Archive: DRA006339). The raw data of fungal community structure and the fungal  
466 community matrices analyzed are available with the source study [52] and Additional files  
467 1-3, respectively.

468

#### 469 **Authors' contributions**

470 HT designed the work. HT, AST, and HS conducted fieldwork. HT performed the molecular  
471 experiments. HT wrote the manuscript with AST and HS.

472

### 473 **Competing interests**

474 The authors declare that they have no competing interests.

475

### 476 **Consent for publication**

477 Not applicable

478

### 479 **Ethics approval and consent to participate**

480 Not applicable

481

### 482 **Additional files**

483 **Additional file 1: Data S1.** Sample-level matrices of the eight forests examined.

484 **Additional file 2: Data S2.** Species-level matrices of plant–fungus associations.

485 **Additional file 3: Data S3.** Information of 8080 fungal OTUs analyzed.

486 **Additional file 4: Figure S1.** Number of sequencing reads, interaction specificity, and local  
487 betweenness.

488 **Additional file 5: Figure S2.** Structure of plant–fungus networks in each local forest.

489 **Additional file 6: Figure S3.** Locality information within the full metacommunity-scale  
490 network.

491 **Additional file 7: Figure S4.** Metacommunity-scale network of cool-temperate forests.

492 **Additional file 8: Figure S5.** Metacommunity-scale network of warm-temperate and  
493 subtropical forests.

494 **Additional file 9: Table S1.** Top-10 list of non-Glomeromycota OTUs with highest  
495 betweenness within the subtropical metacommunity network.

496

## 497 **References**

- 498 1. Peay KG, Kennedy PG, Talbot JM: Dimensions of biodiversity in the Earth  
499 mycobiome. *Nat. Rev. Microbiol.* 2016;14:434-447.
- 500 2. van der Heijden MG, Bardgett RD, van Straalen NM: The unseen majority: soil  
501 microbes as drivers of plant diversity and productivity in terrestrial ecosystems. *Ecol.*  
502 *Lett.* 2008;11:296-310.
- 503 3. van der Heijden MG, Klironomos JN, Ursic M, Moutoglis P, Streitwolf-Engel R,  
504 Boller T et al: Mycorrhizal fungal diversity determines plant biodiversity, ecosystem  
505 variability and productivity. *Nature* 1998;396:69-72.
- 506 4. Wardle DA, Bardgett RD, Klironomos JN, Setälä H, van der Putten WH, Wall DH:  
507 Ecological linkages between aboveground and belowground biota. *Science*  
508 2004;304:1629-1633.
- 509 5. Nara K: Ectomycorrhizal networks and seedling establishment during early primary  
510 succession. *New Phytol.* 2006;169:169-178.
- 511 6. Finlay R, Read D: The structure and function of the vegetative mycelium of  
512 ectomycorrhizal plants. II. The uptake and distribution of phosphorus by mycelial  
513 strands interconnecting host plants. *New Phytol.* 1986;103:157-165.
- 514 7. Klironomos JN, McCune J, Hart M, Neville J: The influence of arbuscular  
515 mycorrhizae on the relationship between plant diversity and productivity. *Ecol. Lett.*  
516 2000;3:137-141.
- 517 8. Högberg MN, Högberg P: Extramatrical ectomycorrhizal mycelium contributes  
518 one-third of microbial biomass and produces, together with associated roots, half the

- 519 dissolved organic carbon in a forest soil. *New Phytol.* 2002;154:791-795.
- 520 9. Högberg P, Nordgren A, Buchmann N, Taylor AF, Ekblad A, Högberg MN et al:  
521 Large-scale forest girdling shows that current photosynthesis drives soil respiration.  
522 *Nature* 2001;411:789-792.
- 523 10. Almario J, Jeena G, Wunder J, Langen G, Zuccaro A, Coupland G et al:  
524 Root-associated fungal microbiota of nonmycorrhizal *Arabidopsis thaliana* and its  
525 contribution to plant phosphorus nutrition. *Proc. Natl. Acad. Sci. USA.*  
526 2017;114:E9403–E9412.
- 527 11. Hiruma K, Gerlach N, Sacristán S, Nakano RT, Hacquard S, Kracher B et al: Root  
528 endophyte *Colletotrichum tofieldiae* confers plant fitness benefits that are phosphate  
529 status dependent. *Cell* 2016;165:464-474.
- 530 12. Hashiba T, Narisawa K: The development and endophytic nature of the fungus  
531 *Heteroconium chaetospora*. *FEMS Microbiol. Lett.* 2005;252:191-196.
- 532 13. Addy H, Piercey M, Currah R: Microfungal endophytes in roots. *Can. J. Bot.*  
533 2005;83:1-13.
- 534 14. Jumpponen A: Dark septate endophytes-are they mycorrhizal? *Mycorrhiza*  
535 2001;11:207-211.
- 536 15. Newsham KK: A meta-analysis of plant responses to dark septate root endophytes.  
537 *New Phytol.* 2011;190:783-793.
- 538 16. Narisawa K, Tokumasu S, Hashiba T: Suppression of clubroot formation in Chinese  
539 cabbage by the root endophytic fungus, *Heteroconium chaetospora*. *Plant Pathol.*  
540 1998;47:206-210.
- 541 17. Calvo P, Nelson L, Kloepper JW: Agricultural uses of plant biostimulants. *Plant Soil*  
542 2014;383:3-41.
- 543 18. Porras-Alfaro A, Bayman P: Hidden fungi, emergent properties: endophytes and  
544 microbiomes. *Ann. Rev. Phytopathol.* 2011;49:291-315.
- 545 19. Mandyam K, Jumpponen A: Seeking the elusive function of the root-colonising dark  
546 septate endophytic fungi. *Studies Mycol.* 2005;53:173-189.

- 547 20. Fuchs B, Haselwandter K: Red list plants: colonization by arbuscular mycorrhizal  
548 fungi and dark septate endophytes. *Mycorrhiza* 2004;14:277-281.
- 549 21. Tedersoo L, Bahram M, Põlme S, Kõljalg U, Yorou NS, Wijesundera R et al: Global  
550 diversity and geography of soil fungi. *Science* 2014;346:1256688.
- 551 22. Buée M, Reich M, Murat C, Morin E, Nilsson R, Uroz S et al: 454 Pyrosequencing  
552 analyses of forest soils reveal an unexpectedly high fungal diversity. *New Phytol.*  
553 2009;184:449-456.
- 554 23. Öpik M, Vanatoa A, Vanatoa E, Moora M, Davison J, Kalwij J et al: The online  
555 database MaarjAM reveals global and ecosystemic distribution patterns in arbuscular  
556 mycorrhizal fungi (Glomeromycota). *New Phytol.* 2010;188:223-241.
- 557 24. Toju H, Guimarães PR, Jr, Olesen JM, Thompson JN: Assembly of complex plant–  
558 fungus networks. *Nat. Commun.* 2014;5:5273.
- 559 25. Toju H, Guimarães PR, Jr, Olesen JM, Thompson JN: Below-ground plant–fungus  
560 network topology is not congruent with above-ground plant–animal network topology.  
561 *Sci. Adv.* 2015;1:e1500291.
- 562 26. Kadowaki K, Yamamoto S, Sato H, Tanabe AS, Hidaka A, Toju H: Plant–soil  
563 feedbacks between arbuscular- and ecto-mycorrhizal communities. *bioRxiv*  
564 2017:<https://doi.org/10.1101/228387>
- 565 27. Schlaeppi K, Bulgarelli D: The plant microbiome at work. *Mol. Plant-Microbe Int.*  
566 2015;28:212-217.
- 567 28. Berendsen RL, Pieterse CM, Bakker PA: The rhizosphere microbiome and plant  
568 health. *Trends Plant Sci.* 2012;17:478-486.
- 569 29. Busby PE, Soman C, Wagner MR, Friesen ML, Kremer J, Bennett A et al: Research  
570 priorities for harnessing plant microbiomes in sustainable agriculture. *PLOS Biol.*  
571 2017;15:e2001793.
- 572 30. Albert R, Jeong H, Barabási AL: Error and attack tolerance of complex networks.  
573 *Nature* 2000;406:378-382.
- 574 31. Newman MEJ: *Networks: an introduction*. Oxford: Oxford University Press; 2010.

- 575 32. Toju H, Tanabe A, Ishii H: Ericaceous plant–fungus network in a harsh alpine–  
576 subalpine environment. *Mol. Ecol.* 2016;25:3242-3257.
- 577 33. Bennett AE, Daniell TJ, Öpik M, Davison J, Moora M, Zobel M et al: Arbuscular  
578 mycorrhizal fungal networks vary throughout the growing season and between  
579 successional stages. *PLoS One* 2013;8:e83241.
- 580 34. Bahram M, Harend H, Tedersoo L: Network perspectives of ectomycorrhizal  
581 associations. *Fungal Ecol.* 2014;7:70-77.
- 582 35. Toju H, Yamamichi M, Guimarães Jr. PR, Olesen J, Mougi A, Yoshida T et al:  
583 Species-rich networks and eco-evolutionary synthesis at the metacommunity level.  
584 *Nat. Ecol. Evol.* 2017;1.
- 585 36. Agler MT, Ruhe J, Kroll S, Morhenn C, Kim S-T, Weigel D et al: Microbial hub taxa  
586 link host and abiotic factors to plant microbiome variation. *PLOS Biol.*  
587 2016;14:e1002352.
- 588 37. Toju H, Yamamoto S, Tanabe AS, Hayakawa T, Ishii HS: Network modules and hubs  
589 in plant-root fungal biome. *J. R. Soc. Interface* 2016;13:20151097.
- 590 38. Smith SE, Read DJ: *Mycorrhizal symbiosis*. New York: Academic press; 2008.
- 591 39. Dickie IA, Koide RT, Fayish AC: Vesicular-arbuscular mycorrhizal infection of  
592 *Quercus rubra* seedlings. *New Phytol.* 2001;151:257-264.
- 593 40. Plattner I, Hall I: Parasitism of non-host plants by the mycorrhizal fungus *Tuber*  
594 *melanosporum*. *Mycol. Res.* 1995;99:1367-1370.
- 595 41. Hallenberg N, Kuffer N: Long - distance spore dispersal in wood - inhabiting  
596 basidiomycetes. *Nordic J. Bot.* 2001;21:431-436.
- 597 42. Nagarajan S, Singh D: Long-distance dispersion of rust pathogens. *Ann. Rev.*  
598 *Phytopathol.* 1990;28:139-153.
- 599 43. Brown JK, Hovmøller MS: Aerial dispersal of pathogens on the global and continental  
600 scales and its impact on plant disease. *Science* 2002;297:537-541.
- 601 44. Hovmøller M, Justesen A, Brown J: Clonality and long - distance migration of  
602 *Puccinia striiformis* f. sp. tritici in north - west Europe. *Plant Pathol.* 2002;51:24-32.

- 603 45. Jousimo J, Tack AJ, Ovaskainen O, Mononen T, Susi H, Tollenaere C et al:  
604 Ecological and evolutionary effects of fragmentation on infectious disease dynamics.  
605 Science 2014;344:1289-1293.
- 606 46. Parker MA: Mutualism in metapopulations of legumes and rhizobia. Am. Nat.  
607 1999;153:S48-S60.
- 608 47. Thrall PH, Burdon JJ: Evolution of virulence in a plant host-pathogen metapopulation.  
609 Science 2003;299:1735-1737.
- 610 48. Lekberg Y, Koide RT, Rohr JR, ALDRICH - WOLFE L, Morton JB: Role of niche  
611 restrictions and dispersal in the composition of arbuscular mycorrhizal fungal  
612 communities. J. Ecol. 2007;95:95-105.
- 613 49. Peay KG, Schubert MG, Nguyen NH, Bruns TD: Measuring ectomycorrhizal fungal  
614 dispersal: macroecological patterns driven by microscopic propagules. Mol. Ecol.  
615 2012;21:4122-4136.
- 616 50. Gouhier TC, Guichard F, Gonzalez A: Synchrony and stability of food webs in  
617 metacommunities. Am. Nat. 2010;175:E16-E34.
- 618 51. Miller R, Jastrow J: The application of VA mycorrhizae to ecosystem restoration and  
619 reclamation. New York: Springer; 1992.
- 620 52. Toju H, Sato H, Yamamoto S, Tanabe AS: Structural diversity across arbuscular  
621 mycorrhizal, ectomycorrhizal, and endophytic plant–fungus networks. bioRxiv  
622 2018:<https://doi.org/10.1101/269563>
- 623 53. Caruso T, Rillig MC, Garlaschelli D: On the application of network theory to  
624 arbuscular mycorrhizal fungi–plant interactions: the importance of basic assumptions.  
625 New Phytol. 2012;194:891-894.
- 626 54. Thompson JN: The geographic mosaic of coevolution. Chicago: University of  
627 Chicago Press; 2005.
- 628 55. Toju H, Tanabe AS, Yamamoto S, Sato H: High-coverage ITS primers for the  
629 DNA-based identification of ascomycetes and basidiomycetes in environmental  
630 samples. PLOS ONE 2012;7:e40863.
- 631 56. Smith DP, Peay KG: Sequence depth, not PCR replication, improves ecological



- 632 inference from next generation DNA sequencing. PLOS ONE 2014;9:e90234.
- 633 57. O'Brien HE, Parrent JL, Jackson JA, Moncalvo J-M, Vilgalys R: Fungal community  
634 analysis by large-scale sequencing of environmental samples. Appl. Env. Microbiol.  
635 2005;71:5544-5550.
- 636 58. Kõljalg U, Nilsson RH, Abarenkov K, Tedersoo L, Taylor AF, Bahram M et al:  
637 Towards a unified paradigm for sequence-based identification of fungi. Mol. Ecol.  
638 2013;22:5271-5277.
- 639 59. Thiéry O, Vasar M, Jairus T, Davison J, Roux C, Kivistik PA et al: Sequence variation  
640 in nuclear ribosomal small subunit, internal transcribed spacer and large subunit  
641 regions of *Rhizophagus irregularis* and *Gigaspora margarita* is high and isolate -  
642 dependent. Mol. Ecol. 2016;25:2816-2832.
- 643 60. Tanabe AS: Claident v0.2.2016.07.05, a software distributed by author at  
644 <http://www.fifthdimension.jp/>. 2016.
- 645 61. Tanabe AS, Toju H: Two new computational methods for universal DNA barcoding: a  
646 benchmark using barcode sequences of bacteria, archaea, animals, fungi, and land  
647 plants. PLOS ONE 2013;8:e76910.
- 648 62. Huson DH, Auch AF, Qi J, Schuster SC: MEGAN analysis of metagenomic data.  
649 Genome Res. 2007;17:377-386.
- 650 63. Nguyen NH, Song Z, Bates ST, Branco S, Tedersoo L, Menke J et al: FUNGuild: an  
651 open annotation tool for parsing fungal community datasets by ecological guild.  
652 Fungal Ecol. 2016;20:241-248.
- 653 64. Anderson MJ: A new method for non-parametric multivariate analysis of variance.  
654 Austral Ecol. 2001;26:32-46.
- 655 65. Anderson MJ: Distance-based tests for homogeneity of multivariate dispersions.  
656 Biometrics 2006;62:245-253.
- 657 66. Oksanen J, Blanchet FG, Kindt R, Legendre P, Minchin PR, O'Hara RB et al: Vegan:  
658 community ecology package. R package version 2.0-3 available at  
659 <http://CRAN.R-project.org/package=vegan>. 2012;10:2008.
- 660 67. R-Core-Team: R 3.4.1: A language and environment for statistical computing

- 661 available at <http://www.R-project.org/>. In. Vienna, Austri: R Foundation for  
662 Statistical Computing; 2015.
- 663 68. Chase JM, Kraft NJ, Smith KG, Vellend M, Inouye BD: Using null models to  
664 disentangle variation in community dissimilarity from variation in  $\alpha$ -diversity.  
665 *Ecosphere* 2011;2:1-11.
- 666 69. Bastian M, Heymann S, Jacomy M: Gephi: an open source software for exploring and  
667 manipulating networks. *Proceedings of the 3rd International AAAI Conference on*  
668 *Weblogs and Social Media* 2009;8:361-362.
- 669 70. Jacomy M, Heymann S, Venturini T, Bastian M: ForceAtlas2, a continuous graph  
670 layout algorithm for handy network visualization designed for the Gephi Software.  
671 *PLOS ONE* 2011;96:e98679.
- 672 71. Blüthgen N, Menzel F, Blüthgen N: Measuring specialization in species interaction  
673 networks. *BMC Ecol.* 2006;6:9.
- 674 72. Freeman LC: A set of measures of centrality based on betweenness. *Sociometry*  
675 1977;40:35-41.
- 676 73. Tedersoo L, Pärtel K, Jairus T, Gates G, Põldmaa K, Tamm H: Ascomycetes  
677 associated with ectomycorrhizas: molecular diversity and ecology with particular  
678 reference to the Helotiales. *Env. Microbiol.* 2009;11:3166-3178.
- 679 74. Rossman AY, Farr DF, Castlebury LA: A review of the phylogeny and biology of the  
680 *Diaporthales*. *Mycoscience* 2007;48:135-144.
- 681 75. Sieber TN: Endophytic fungi in forest trees: are they mutualists? *Fungal Biol. Rev.*  
682 2007;21:75-89.
- 683 76. Liu X-Z, Wang Q-M, Göker M, Groenewald M, Kachalkin A, Lumbsch HT et al:  
684 Towards an integrated phylogenetic classification of the Tremellomycetes. *Studies*  
685 *Mycol.* 2015;81:85-147.
- 686 77. Watanabe T: Pictorial atlas of soil and seed fungi: morphologies of cultured fungi and  
687 key to species. Boca Raton: CRC press; 2010.
- 688 78. Zhang H, Wu X, Li G, Qin P: Interactions between arbuscular mycorrhizal fungi and  
689 phosphate-solubilizing fungus (*Mortierella* sp.) and their effects on *Kosteletzkya*

- 690 virginica growth and enzyme activities of rhizosphere and bulk soils at different  
691 salinities. Biol. Fertil. Soils 2011;47:543.
- 692 79. Eroshin V, Dedyukhina E: Effect of lipids from *Mortierella hygrophila* on plant  
693 resistance to phytopathogens. World J. Microbiol. Biotechnol. 2002;18:165-167.
- 694 80. Melo IS, Santos SN, Rosa LH, Parma MM, Silva LJ, Queiroz SC et al: Isolation and  
695 biological activities of an endophytic *Mortierella alpina* strain from the Antarctic  
696 moss *Schistidium antarctici*. Extremophiles 2014;18:15-23.
- 697 81. Papavizas G: *Trichoderma* and *Gliocladium*: biology, ecology, and potential for  
698 biocontrol. Ann. Rev. Phytopathol. 1985;23:23-54.
- 699 82. Datnoff L, Nemeč S, Pernezny K: Biological control of *Fusarium* crown and root rot  
700 of tomato in Florida using *Trichoderma harzianum* and *Glomus intraradices*. Biologi.  
701 Control 1995;5:427-431.
- 702 83. Bailey B, Bae H, Strem M, Crozier J, Thomas S, Samuels G et al: Antibiosis,  
703 mycoparasitism, and colonization success for endophytic *Trichoderma* isolates with  
704 biological control potential in *Theobroma cacao*. Biologi. Control 2008;46:24-35.
- 705 84. Bae H, Roberts DP, Lim H-S, Strem MD, Park S-C, Ryu C-M et al: Endophytic  
706 *Trichoderma* isolates from tropical environments delay disease onset and induce  
707 resistance against *Phytophthora capsici* in hot pepper using multiple mechanisms. Mol.  
708 Plant-Microbe Int. 2011;24:336-351.
- 709 85. AL-Shammari TA, Bahkali AH, Elgorban AM, El-Kahky MT, Al-Sum BA: The use  
710 of *Trichoderma longibrachiatum* and *Mortierella alpina* against root-knot nematode,  
711 *Meloidogyne javanica* on tomato. J. Pure Appl. Microbiol. 2013;7:199-207.
- 712 86. Ming Q, Su C, Zheng C, Jia M, Zhang Q, Zhang H et al: Elicitors from the endophytic  
713 fungus *Trichoderma atroviride* promote *Salvia miltiorrhiza* hairy root growth and  
714 tanshinone biosynthesis. J. Exp. Bot. 2013;64:5687-5694.
- 715 87. Mašínová T, Bahnmann BD, Větrovský T, Tomšovský M, Merunková K, Baldrian P:  
716 Drivers of yeast community composition in the litter and soil of a temperate forest.  
717 FEMS Microbiol. Ecol. 2016;93:fiw223.
- 718 88. Nutaratat P, Srisuk N, Arunrattiyakorn P, Limtong S: Plant growth-promoting traits of

- 719 epiphytic and endophytic yeasts isolated from rice and sugar cane leaves in Thailand.  
720 Fungal Biol. 2014;118:683-694.
- 721 89. Renker C, Blanke V, Börstler B, Heinrichs J, Buscot F: Diversity of *Cryptococcus* and  
722 *Dioszegia* yeasts (Basidiomycota) inhabiting arbuscular mycorrhizal roots or spores.  
723 FEMS Yeast Res. 2004;4:597-603.
- 724 90. Gai CS, Lacava PT, Maccheroni W, Glienke C, Araújo WL, Miller TA et al: Diversity  
725 of endophytic yeasts from sweet orange and their localization by scanning electron  
726 microscopy. J. Basic Microbiol. 2009;49:441-451.
- 727 91. Cloete KJ, Valentine AJ, Stander MA, Blomerus LM, Botha A: Evidence of symbiosis  
728 between the soil yeast *Cryptococcus laurentii* and a sclerophyllous medicinal shrub,  
729 *Agathosma betulina* (Berg.) Pillans. Microb. Ecol. 2009;57:624-632.
- 730 92. Couture M, Fortin J, Dalpe Y: *Oidiodendron griseum* Robak: An endophyte of ericoid  
731 mycorrhiza in *Vaccinium* spp. New Phytol. 1983;95:375-380.
- 732 93. Vohník M, Albrechtová J, Vosátka M: The inoculation with *Oidiodendron maius* and  
733 *Phialocephala fortinii* alters phosphorus and nitrogen uptake, foliar C: N ratio and root  
734 biomass distribution in *Rhododendron* cv. Azurro. Symbiosis 2005;40:87-96.
- 735 94. Rice AV, Currah RS: *Oidiodendron*: A survey of the named species and related  
736 anamorphs of *Myxotrichum*. Studies Mycol. 2005;53:83-120.
- 737 95. Lombard L, Van Der Merwe NA, Groenewald JZ, Crous PW: Lineages in  
738 Nectriaceae: re-evaluating the generic status of *Ilyonectria* and allied genera.  
739 Phytopathol. Mediterr. 2014;53:515-532.
- 740 96. Whitelaw - Weckert M, Rahman L, Appleby L, Hall A, Clark A, Waite H et al: Co -  
741 infection by Botryosphaeriaceae and *Ilyonectria* spp. fungi during propagation causes  
742 decline of young grafted grapevines. Plant Pathol. 2013;62:1226-1237.
- 743 97. Vitale A, Aiello D, Guarnaccia V, Perrone G, Stea G, Polizzi G: First report of root rot  
744 caused by *Ilyonectria* (= *Neonectria*) macrodidyma on avocado (*Persea americana*) in  
745 Italy. J. Phytopathol. 2012;160:156-159.
- 746 98. Usuki F, Narisawa K: Formation of structures resembling ericoid mycorrhizas by the  
747 root endophytic fungus *Heteroconium chaetospira* within roots of *Rhododendron*

- 748            *obtusum* var. *kaempferi*. Mycorrhiza 2005;15:61-64.
- 749    99.    Narisawa K, Hambleton S, Currah RS: *Heteroconium chaetospora*, a dark septate root  
750            endophyte allied to the Herpotrichiellaceae (Chaetothyriales) obtained from some  
751            forest soil samples in Canada using bait plants. Mycoscience 2007;48:274-281.
- 752    100.    Vohník M, Albrechtová J: The co-occurrence and morphological continuum between  
753            ericoid mycorrhiza and dark septate endophytes in roots of six European  
754            *Rhododendron* species. Folia Geobotanica 2011;46:373-386.
- 755    101.    Jumpponen A, Trappe JM: Dark septate endophytes: a review of facultative biotrophic  
756            root-colonizing fungi. New Phytol. 1998;140:295-310.
- 757    102.    Usuki F, Narisawa K: A mutualistic symbiosis between a dark septate endophytic  
758            fungus, *Heteroconium chaetospora*, and a nonmycorrhizal plant, Chinese cabbage.  
759            Mycologia 2007;99:175-184.
- 760    103.    Wang W, Tsuneda A, Gibas CF, Currah RS: *Cryptosporiopsis* species isolated from  
761            the roots of aspen in central Alberta: identification, morphology, and interactions with  
762            the host, in vitro Botany 2007;85:1214-1226.
- 763    104.    Kowalski T, Bartnik C: *Cryptosporiopsis radiciala* sp. nov. from roots of *Quercus*  
764            *robur*. Mycol. Res. 1995;99:663-666.
- 765    105.    Sigler L, Allan T, Lim SR, Berch S, Berbee M: Two new *Cryptosporiopsis* species  
766            from roots of ericaceous hosts in western North America. Studies Mycol.  
767            2005;53:53-62.
- 768    106.    Schulz B, Sucker J, Aust H, Krohn K, Ludewig K, Jones P et al: Biologically active  
769            secondary metabolites of endophytic *Pezizula* species. Mycol. Res.  
770            1995;99:1007-1015.
- 771    107.    Strobel GA, Miller RV, Martinez-Miller C, Condrón MM, Teplow DB, Hess W:  
772            Cryptocandin, a potent antimycotic from the endophytic fungus *Cryptosporiopsis* cf.  
773            *quercina*. Microbiology 1999;145:1919-1926.
- 774    108.    Talbot JM, Bruns TD, Taylor JW, Smith DP, Branco S, Glassman SI et al: Endemism  
775            and functional convergence across the North American soil mycobiome. Proc. Natl.  
776            Acad. Sci. USA. 2014;111:6341-6346.

- 777 109. Martiny JBH, Bohannan BJ, Brown JH, Colwell RK, Fuhrman JA, Green JL et al:  
778 Microbial biogeography: putting microorganisms on the map. *Nat. Rev. Microbiol.*  
779 2006;4:102-112.
- 780 110. De Wit R, Bouvier T: ‘Everything is everywhere, but, the environment selects’; what  
781 did Baas Becking and Beijerinck really say? *Env. Microbiol.* 2006;8:755-758.
- 782 111. Rooney N, McCann K, Gellner G, Moore JC: Structural asymmetry and the stability  
783 of diverse food webs. *Nature* 2006;442:265-269.
- 784 112. Ellison AM, Bank MS, Clinton BD, Colburn EA, Elliott K, Ford CR et al: Loss of  
785 foundation species: consequences for the structure and dynamics of forested  
786 ecosystems. *Front. Ecol. Env.* 2005;3:479-486.
- 787 113. Paine RT: Food web complexity and species diversity. *Am. Nat.* 1966;100:65-75.
- 788 114. Waller F, Achatz B, Baltruschat H, Fodor J, Becker K, Fischer M et al: The  
789 endophytic fungus *Piriformospora indica* reprograms barley to salt-stress tolerance,  
790 disease resistance, and higher yield. *Proc. Natl. Acad. Sci. USA.*  
791 2005;102:13386-13391.
- 792 115. Castro-Sowinski S, Herschkovitz Y, Okon Y, Jurkevitch E: Effects of inoculation with  
793 plant growth-promoting rhizobacteria on resident rhizosphere microorganisms. *FEMS*  
794 *Microbiol. Lett.* 2007;276:1-11.
- 795 116. Streeter JG: Failure of inoculant rhizobia to overcome the dominance of indigenous  
796 strains for nodule formation. *Can. J. Bot.* 1994;40:513-522.
- 797 117. Hartman K, van der Heijden MG, Roussely-Provent V, Walser J-C, Schlaeppli K:  
798 Deciphering composition and function of the root microbiome of a legume plant.  
799 *Microbiome* 2017;5:2.
- 800 118. Jumpponen A, Trappe JM: Performance of *Pinus contorta* inoculated with two strains  
801 of root endophytic fungus, *Phialocephala fortinii*: effects of synthesis system and  
802 glucose concentration. *Can. J. Bot.* 1998;76:1205-1213.
- 803 119. Callahan BJ, McMurdie PJ, Rosen MJ, Han AW, Johnson AJA, Holmes SP: DADA2:  
804 high-resolution sample inference from Illumina amplicon data. *Nat. Methods*  
805 2016;13:581-583.

- 806 120. Langille MG, Zaneveld J, Caporaso JG, McDonald D, Knights D, Reyes JA et al:  
807 Predictive functional profiling of microbial communities using 16S rRNA marker  
808 gene sequences. *Nat. Biotech.* 2013;31:814-821.
- 809 121. Vohník M, Mrnka L, Lukešová T, Bruzone MC, Kohout P, Fehrer J: The cultivable  
810 endophytic community of Norway spruce ectomycorrhizas from microhabitats lacking  
811 ericaceous hosts is dominated by ericoid mycorrhizal *Meliniomyces variabilis*. *Fungal*  
812 *Ecol.* 2013;6:281-292.
- 813 122. Richardson AE, Barea J-M, McNeill AM, Prigent-Combaret C: Acquisition of  
814 phosphorus and nitrogen in the rhizosphere and plant growth promotion by  
815 microorganisms. *Plant Soil* 2009;321:305-339.
- 816 123. Lundberg DS, Lebeis SL, Paredes SH, Yourstone S, Gehring J, Malfatti S et al:  
817 Defining the core *Arabidopsis thaliana* root microbiome. *Nature* 2012;488:86-90.
- 818 124. Bai Y, Müller DB, Srinivas G, Garrido-Oter R, Potthoff E, Rott M et al: Functional  
819 overlap of the *Arabidopsis* leaf and root microbiota. *Nature* 2015;528:364-369.
- 820 125. Edwards J, Johnson C, Santos-Medellín C, Lurie E, Podishetty NK, Bhatnagar S et al:  
821 Structure, variation, and assembly of the root-associated microbiomes of rice. *Proc.*  
822 *Natl. Acad. Sci. USA.* 2015;112:E911-E920.
- 823 126. Faust K, Raes J: Microbial interactions: from networks to models. *Nat. Rev. Microbiol.*  
824 2012;10:538-550.
- 825 127. Kurtz ZD, Mueller CL, Miraldi ER, Littman DR, Blaser MJ, Bonneau RA: Sparse and  
826 compositionally robust inference of microbial ecological networks. *PLOS Comp. Biol.*  
827 2015;11:e1004226.
- 828 128. Arnold AE, Mejía LC, Kyllö D, Rojas EI, Maynard Z, Robbins N et al: Fungal  
829 endophytes limit pathogen damage in a tropical tree. *Proc. Natl. Acad. Sci. USA.*  
830 2003;100:15649-15654.  
831

832 **Table 1** Top-10 list of non-Glomeromycota OTUs with highest betweenness within the metacommunity networks. In each of the three  
833 metacommunity-scale networks examined (full, cool-temperate, and warm-temperate/subtropical), fungal OTUs were ranked based on their  
834 betweenness centrality scores. As taxonomic information of Glomeromycota OTUs with high betweenness scores was redundant (e.g., *Glomus*  
835 spp. or Glomeraceae spp.), the top-10 list of non-Glomeromycota OTUs is shown. Taxonomy information of each OTU was inferred based on  
836 the query-centric auto-*k*-nearest-neighbor algorithm of reference database search [60, 61] and subsequent taxonomic assignment with the lowest  
837 common ancestor algorithm [62]. The results of the NCBI nucleotide Blast are also shown. For simplicity, the functional groups of fungi inferred  
838 with the program FUNGuild [63] were organized into several categories. See Data S3 (Additional file 3) for details of the categories and for full  
839 results including Glomeromycota and other fungal OTUs.

840

| OTU           | Phylum        | Class             | Order            | Family            | Genus                | Category             | NCBI Blast top hit           | Accession | Cover | Identity |
|---------------|---------------|-------------------|------------------|-------------------|----------------------|----------------------|------------------------------|-----------|-------|----------|
| Full (8sites) |               |                   |                  |                   |                      |                      |                              |           |       |          |
| F_0042*       | -             | -                 | Mortierellales   | Mortierellaceae   | <i>Mortierella</i>   | Saprotroph/Endophyte | <i>Mortierella humilis</i>   | KP714537  | 100%  | 100%     |
| F_0381        | Basidiomycota | Tremellomycetes   | Trichosporonales | Trichosporonaceae | <i>Cryptococcus</i>  | Others_Unknown       | <i>Saitozyma podzolica</i> † | KY320605  | 92%   | 99%      |
| F_0079        | Ascomycota    | Sordariomycetes   | Hypocreales      | Nectriaceae       | -                    | Saprotroph/Endophyte | <i>Ilyonectria protearum</i> | NR_152890 | 99%   | 100%     |
| F_0489        | -             | -                 | Mortierellales   | Mortierellaceae   | <i>Mortierella</i>   | Saprotroph/Endophyte | <i>Mortierella</i> sp.       | KM113754  | 100%  | 100%     |
| F_0010        | Ascomycota    | Leotiomycetes     | -                | Myxotrichaceae    | <i>Oidiodendron</i>  | Ericoid_Mycorrhizal  | <i>Oidiodendron maius</i>    | LC206669  | 100%  | 100%     |
| F_0368        | Basidiomycota | Malasseziomycetes | Malasseziales    | Malasseziaceae    | <i>Malassezia</i>    | Others_Unknown       | <i>Malassezia restricta</i>  | KT809059  | 100%  | 100%     |
| F_0623        | -             | -                 | Mortierellales   | Mortierellaceae   | <i>Mortierella</i>   | Saprotroph/Endophyte | <i>Mortierella gamsii</i>    | KY305027  | 100%  | 100%     |
| F_1188        | Basidiomycota | Tremellomycetes   | Trichosporonales | Trichosporonaceae | <i>Cryptococcus</i>  | Others_Unknown       | <i>Saitozyma podzolica</i> † | KY320605  | 92%   | 99%      |
| F_0007        | Ascomycota    | Sordariomycetes   | Diaporthales     | Melanconidaceae   | <i>Melanconiella</i> | Saprotroph/Endophyte | <i>Melanconiella elegans</i> | KJ173701  | 100%  | 85%      |
| F_0485        | Ascomycota    | Sordariomycetes   | Hypocreales      | Hypocreaceae      | <i>Trichoderma</i>   | Saprotroph/Endophyte | <i>Trichoderma</i> sp.       | HG008760  | 100%  | 100%     |



|                                                   |               |                 |                  |                     |                         |                      |                                     |           |      |      |
|---------------------------------------------------|---------------|-----------------|------------------|---------------------|-------------------------|----------------------|-------------------------------------|-----------|------|------|
| F_0079*                                           | Ascomycota    | Sordariomycetes | Hypocreales      | Nectriaceae         | -                       | Saprotroph/Endophyte | <i>Ilyonectria protearum</i>        | NR_152890 | 99%  | 100% |
| F_0015*                                           | Ascomycota    | -               | -                | -                   | -                       | Others_Unknown       | <i>Cadophora orchidicola</i>        | KX611558  | 100% | 99%  |
| F_0202*                                           | Ascomycota    | Eurotiomycetes  | Chaetothyriales  | Herpotrichiellaceae | <i>Cladophialophora</i> | Saprotroph/Endophyte | <i>Cladophialophora chaetospira</i> | HQ871875  | 100% | 99%  |
| F_0195*                                           | Ascomycota    | Eurotiomycetes  | Chaetothyriales  | Herpotrichiellaceae | <i>Cladophialophora</i> | Saprotroph/Endophyte | <i>Cladophialophora chaetospira</i> | EU035405  | 100% | 100% |
| F_0181*                                           | Ascomycota    | Leotiomycetes   | Helotiales       | Dermateaceae        | <i>Pezicula</i>         | Endophyte            | <i>Pezicula melanigena</i>          | LC206665  | 100% | 99%  |
| F_0010                                            | Ascomycota    | Leotiomycetes   | -                | Myxotrichaceae      | <i>Oidiodendron</i>     | Ericoid_Mycorrhizal  | <i>Oidiodendron maius</i>           | LC206669  | 100% | 100% |
| F_0103*                                           | Ascomycota    | Eurotiomycetes  | Chaetothyriales  | Herpotrichiellaceae | <i>Cladophialophora</i> | Saprotroph/Endophyte | <i>Cladophialophora chaetospira</i> | EU035403  | 100% | 97%  |
| F_0489*                                           | -             | -               | Mortierellales   | Mortierellaceae     | <i>Mortierella</i>      | Saprotroph/Endophyte | <i>Mortierella</i> sp.              | KM113754  | 100% | 100% |
| Southern 4 sites (warm-temperate and subtropical) |               |                 |                  |                     |                         |                      |                                     |           |      |      |
| F_0381*                                           | Basidiomycota | Tremellomycetes | Trichosporonales | Trichosporonaceae   | <i>Cryptococcus</i>     | Others_Unknown       | <i>Saitozyma podzolica</i> †        | KY320605  | 92%  | 99%  |
| F_0042*                                           | -             | -               | Mortierellales   | Mortierellaceae     | <i>Mortierella</i>      | Saprotroph/Endophyte | <i>Mortierella humilis</i>          | KP714537  | 100% | 100% |
| F_0610*                                           | Ascomycota    | Sordariomycetes | Hypocreales      | Hypocreaceae        | <i>Trichoderma</i>      | Saprotroph/Endophyte | <i>Trichoderma spirale</i>          | KU948158  | 100% | 100% |
| F_1188*                                           | Basidiomycota | Tremellomycetes | Trichosporonales | Trichosporonaceae   | <i>Cryptococcus</i>     | Others_Unknown       | <i>Saitozyma podzolica</i> †        | KY320605  | 92%  | 99%  |
| F_0029                                            | Ascomycota    | Eurotiomycetes  | Chaetothyriales  | Herpotrichiellaceae | -                       | Others_Unknown       | <i>Cladophialophora</i> sp.         | LC189029  | 100% | 99%  |
| F_0017                                            | Ascomycota    | -               | -                | -                   | -                       | Others_Unknown       | <i>Scleropezicula</i> sp.           | KT809119  | 100% | 98%  |
| F_0007                                            | Ascomycota    | Sordariomycetes | Diaporthales     | Melanconidaceae     | <i>Melanconiella</i>    | Saprotroph/Endophyte | <i>Melanconiella elegans</i>        | KJ173701  | 100% | 85%  |
| F_0485                                            | Ascomycota    | Sordariomycetes | Hypocreales      | Hypocreaceae        | <i>Trichoderma</i>      | Saprotroph/Endophyte | <i>Trichoderma</i> sp.              | HG008760  | 100% | 100% |
| F_0112                                            | Basidiomycota | Agaricomycetes  | Thelephorales    | Thelephoraceae      | <i>Tomentella</i>       | Ectomycorrhizal      | <i>Tomentella stiposa</i>           | KR019860  | 100% | 98%  |
| F_0073                                            | Ascomycota    | Sordariomycetes | -                | -                   | -                       | Others_Unknown       | <i>Rhexodenticula acaciae</i>       | KY173442  | 94%  | 95%  |

841 \*Fungal OTUs classified as metacommunity hubs (mean local betweenness > 0.5; metacommunity betweenness > 0.5)

842 †Synonym, *Cryptococcus podzolica*

843

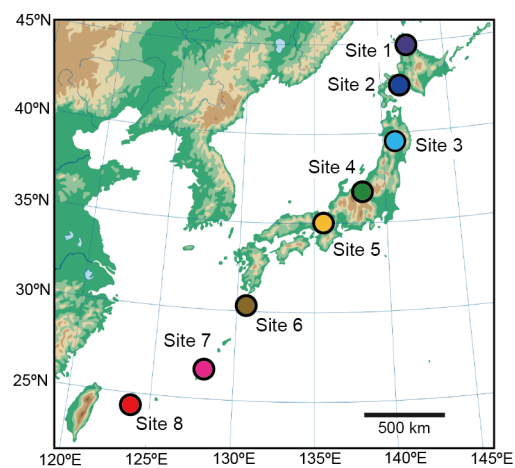

844

845

846 **Fig. 1** Study sites examined in this study. Across the entire range of the Japanese  
847 root samples were collected in four cool-temperate forests (sites 1–4), one warm-  
848 forest (site 5), and three subtropical forests (sites 6–8).

849

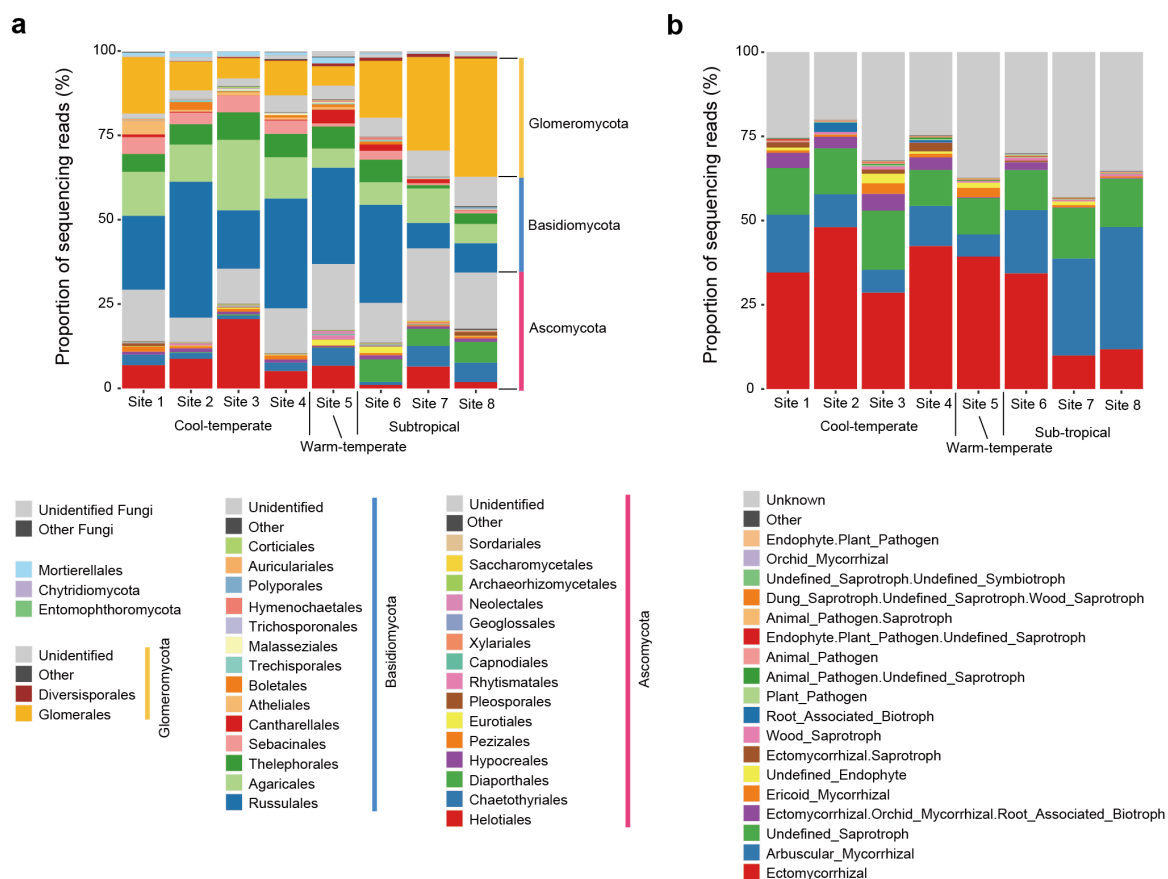

850

851

852 **Fig. 2** Compositions of fungal taxa and functional groups in each forest. **a** Order-level  
 853 taxonomic composition of fungal OTUs in each locality. The number of fungal OTUs  
 854 detected is shown in a parenthesis for each forest. **b** Functional-group composition. The  
 855 fungal functional groups were inferred by the program FUNGuild [63].

856

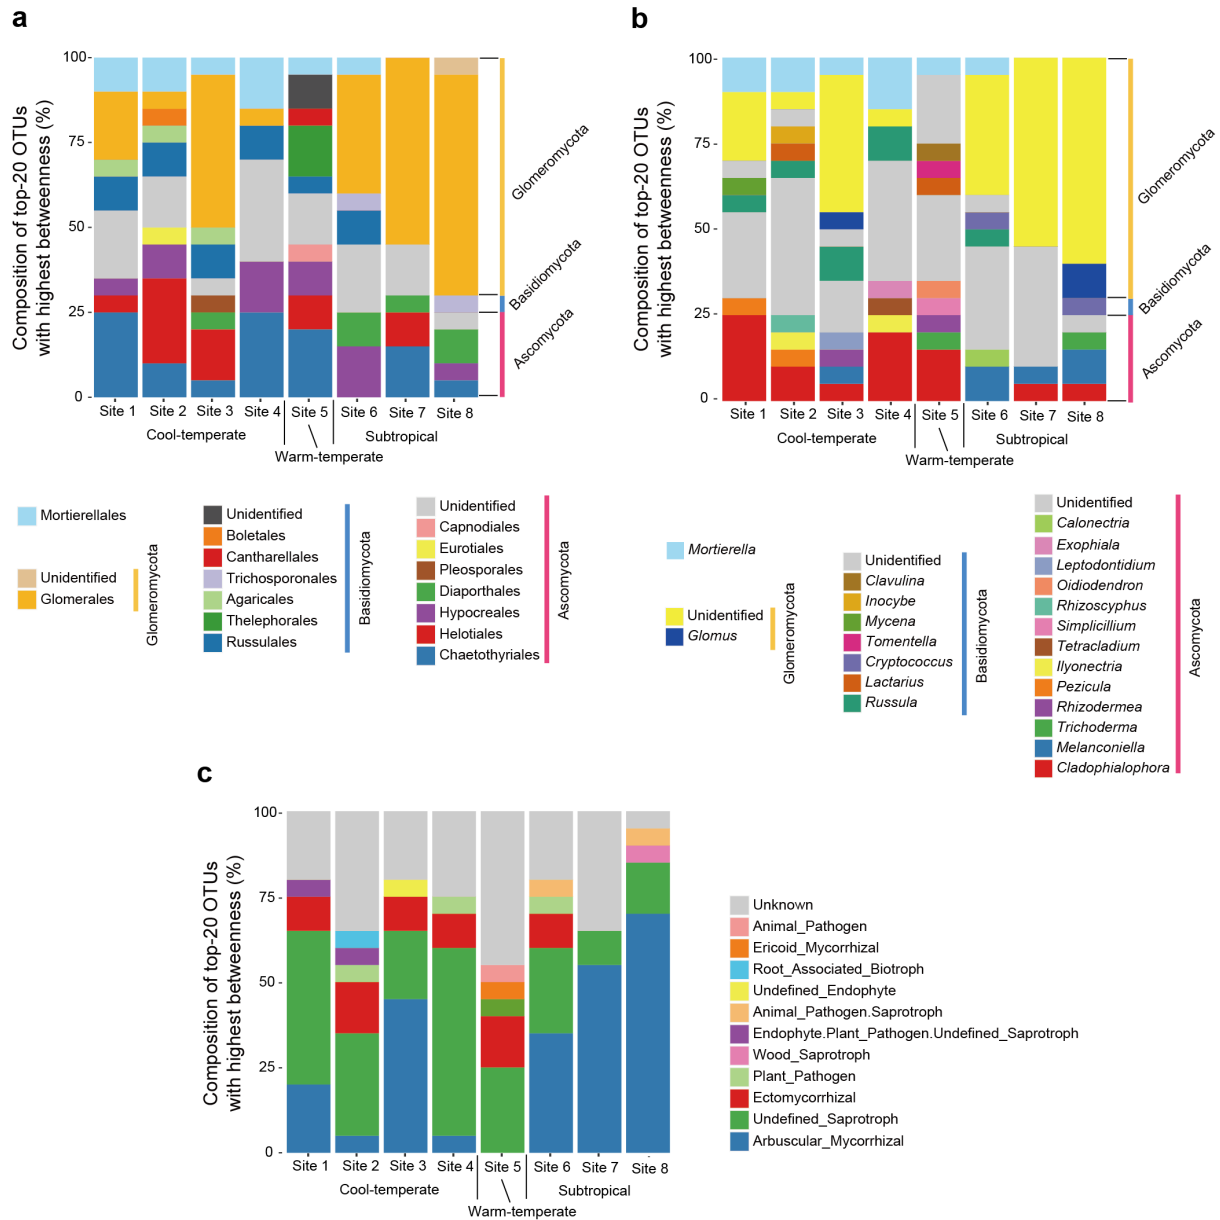

857

858

859 **Fig. 3** Fungal OTUs with highest local betweenness. **a** Order-level taxonomic composition of  
 860 top-20 OTUs with highest local betweenness in each forest. See Data S3 (Additional file 3)  
 861 for betweenness scores of all fungal OTUs in respective local forests. **b** Genus-level  
 862 taxonomic composition of top-20 OTUs with highest local betweenness. **c** Functional-group  
 863 composition of top-20 OTUs with highest local betweenness.

864

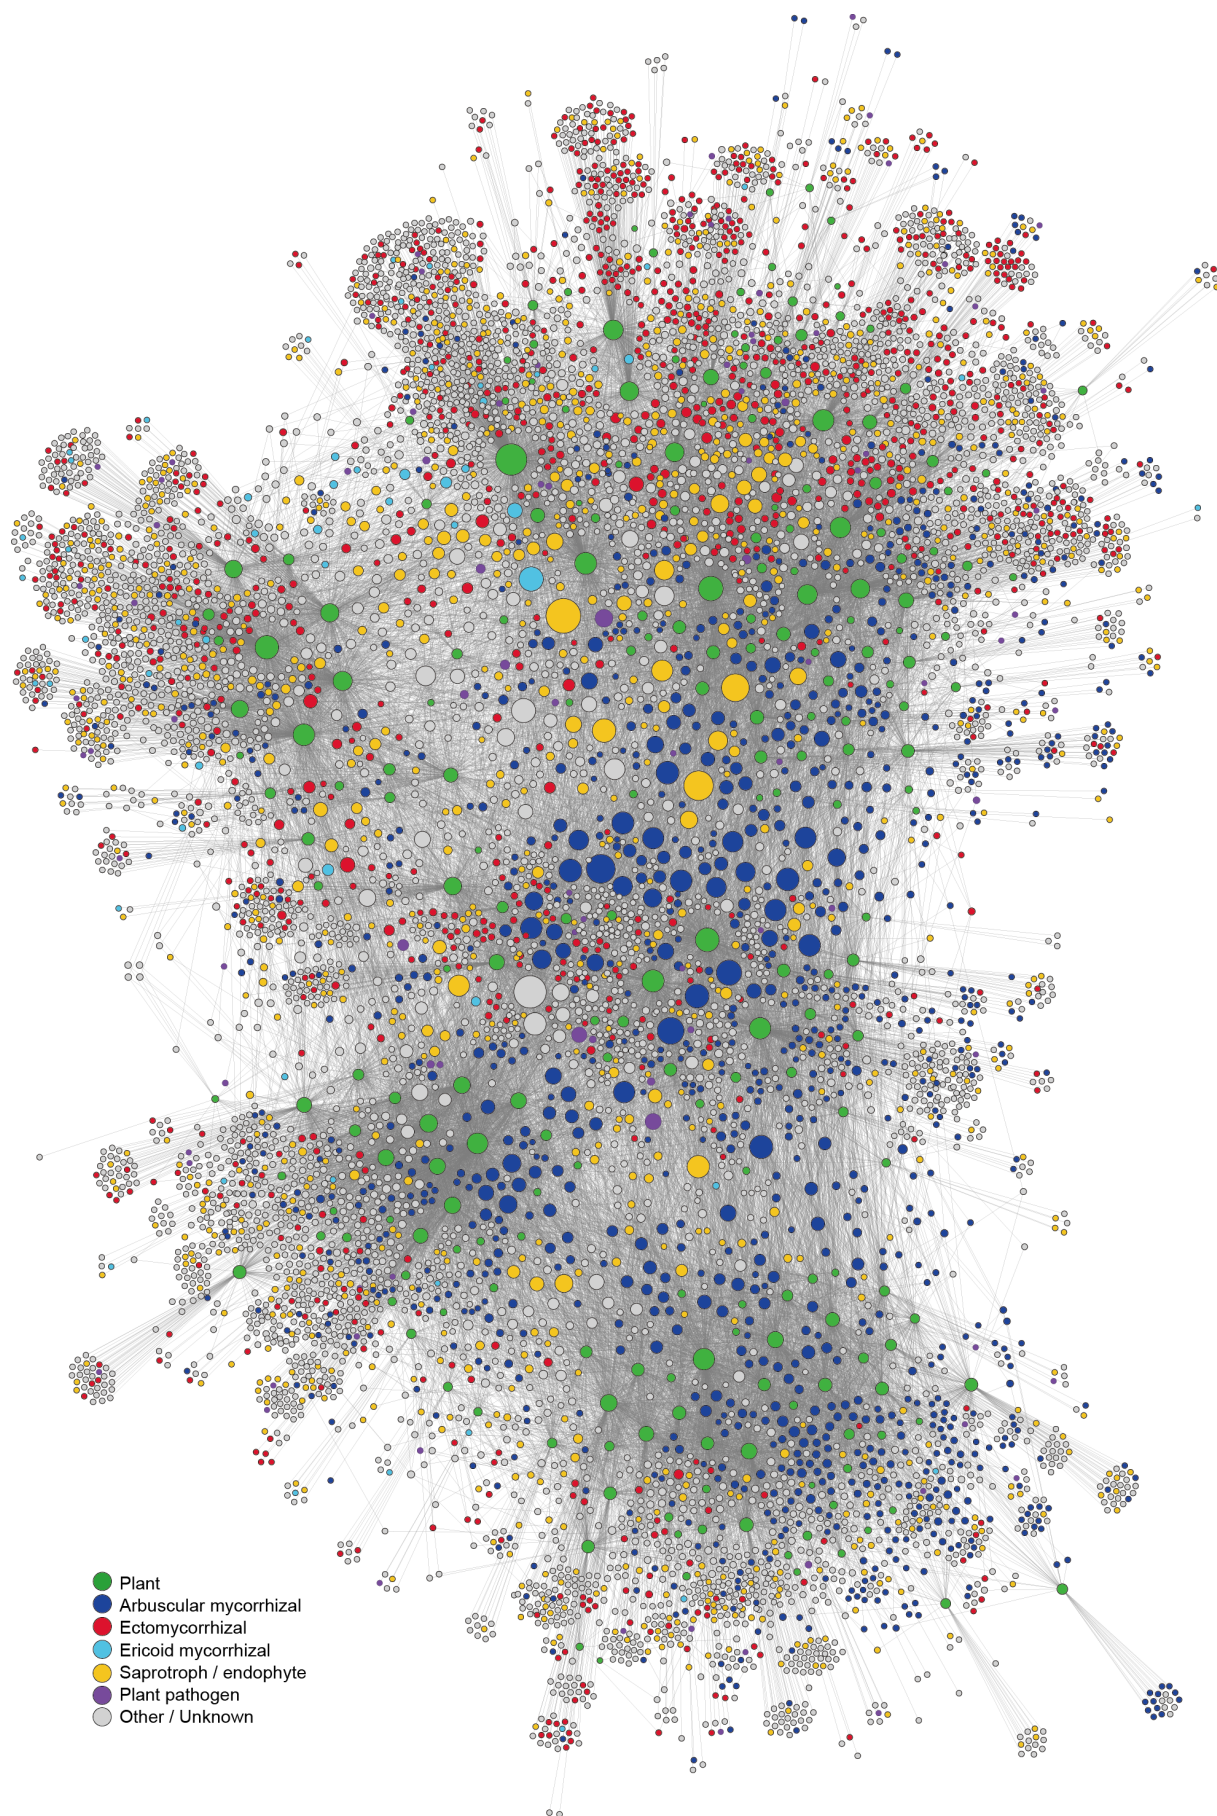

866

867 **Fig. 4** Metacommunity-scale network including all the eight local forests. The size of circles  
868 roughly represents relative scores of betweenness centrality. The functional groups of fungi  
869 inferred with the program FUNGuild [63] were organized into six categories: i.e., arbuscular  
870 mycorrhizal (blue), ectomycorrhizal (red), ericoid mycorrhizal (skyblue),  
871 saprotrophic/endophytic (yellow), plant pathogenic (purple), and other/unknown fungi (grey)  
872 (Additional file 3; Data S3). For plant species/taxa (green), the geographic information of  
873 source populations is indicated in Additional file 6 (Figure S3).

874

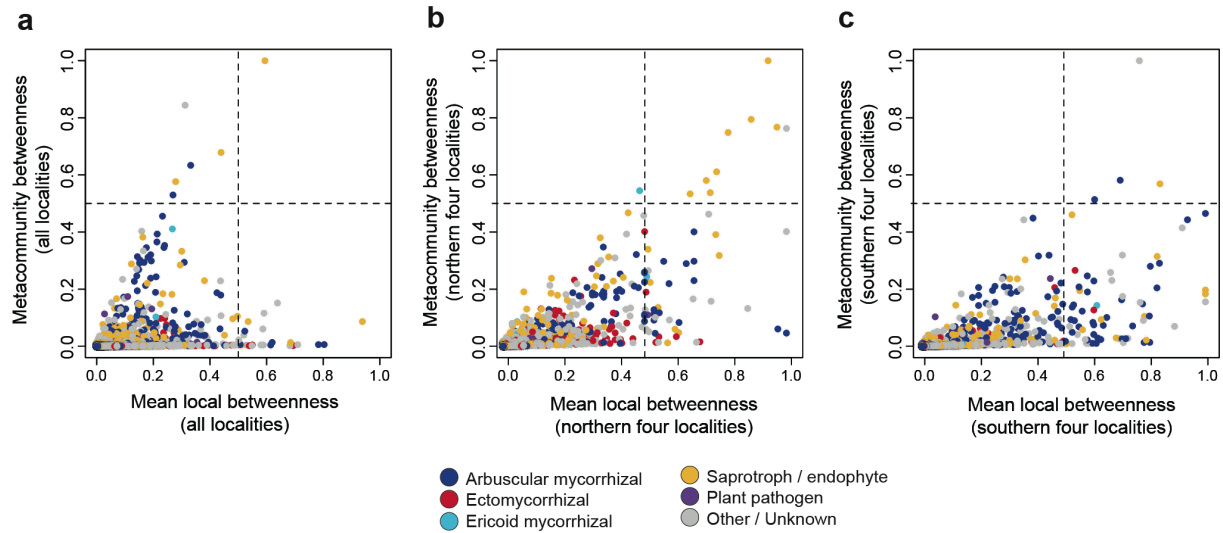

875

876

877 **Fig. 5** Relationship between local- and metacommunity-level betweenness. **a** Full  
878 metacommunity. On the horizontal axis, the mean values of betweenness centrality scores  
879 across all the eight local forests are shown for respective fungal OTUs. On the vertical axis,  
880 the betweenness scores within the metacommunity-scale network consisting of the eight  
881 localities (Fig. 4) are shown for respective OTUs. **b** Metacommunity of cool-temperate  
882 forests. For the sub-dataset consisting of the four cool-temperate forests (Additional file 7:  
883 Figure S4), mean local betweenness and metacommunity betweenness are shown on the  
884 horizontal and vertical axes, respectively. **c** Metacommunity of warm-temperate and  
885 subtropical forests. For the sub-dataset consisting of the warm-temperate forest and the three  
886 subtropical forests (Additional file 8: Figure S5), mean local betweenness and  
887 metacommunity betweenness are shown on the horizontal and vertical axes, respectively.
